# Supplementary material for: The PeptideAtlas of a widely cultivated fish Labeo rohita: A resource for the Aquaculture Community
Source: PubMed Central journal article supplement (PMC9008064; doi:10.1038/s41597-022-01259-9), 2022-04-13
Supplement: 41597_2022_1259_MOESM1_ESM.pdf [file 41597_2022_1259_MOESM1_ESM.pdf]

## SUPPLEMENTARY MATERIAL

### Data Descriptor

#### **The PeptideAtlas of a widely cultivated fish *Labeo rohita*: A resource for the Aquaculture Community**

Mehar Un Nissa<sup>1</sup>, Panga Jaipal Reddy<sup>2§</sup>, Nevil Pinto<sup>3§</sup>, Zhi Sun<sup>2</sup>, Biplab Ghosh<sup>4</sup>, Robert L.  
Moritz<sup>2</sup>, Mukunda Goswami<sup>3\*</sup> and Sanjeeva Srivastava<sup>1\*</sup>

<sup>1</sup>Department of Biosciences and Bioengineering, Indian Institute of Technology Bombay,  
Powai, Mumbai 400076, India

<sup>2</sup>Institute for Systems Biology, Seattle, WA, 98109, USA

<sup>3</sup>Central Institute of Fisheries Education, Indian Council of Agricultural Research, Versova,  
Mumbai, Maharashtra 400061

<sup>4</sup>Regional Centre for Biotechnology, Faridabad, 121001, India

<sup>§</sup>Contributed equally

\*Correspondence for fish work: Dr. Mukunda Goswami, E-mail: [mukugoswami@gmail.com](mailto:mukugoswami@gmail.com)

\*Correspondence for proteomics work: Dr. Sanjeeva Srivastava, E-mail: [sanjeeva@iitb.ac.in](mailto:sanjeeva@iitb.ac.in),

Phone: +91-22-2576-7779, Fax: +91-22-2572-3480

## TABLE OF CONTENTS for SUPPLEMENTARY DATA

This manuscript contains **one** Supplementary figure, **three** supplementary files and **five** supplementary tables.

### Supplementary Figures

| Supplementary Figure | Caption                                              |
|----------------------|------------------------------------------------------|
| Figure S1            | SDS-PAGE profile of all organs and peptide frequency |

### Supplementary Files

Supplementary files S1 to S3 are provided as separate documents.

| Supplementary File | Caption                              | File format |
|--------------------|--------------------------------------|-------------|
| File S1            | Tissue wise details of all raw files | .pdf        |
| File S2            | The comet search parameter file      | .pdf        |
| File S3            | MAYU statistical report              | .xlsx       |

### Supplementary Tables

Supplementary Table S1 to S5 are in .xlsx format and provided as separate excel file.

| Supplementary Table | Caption                                                                                                | Number of worksheets |
|---------------------|--------------------------------------------------------------------------------------------------------|----------------------|
| Table S1            | List of all proteins in Rohu PeptideAtlas and EggNOG analysis details                                  | 4                    |
| Table S2            | Experiment wise peptide list of Rohu PeptideAtlas and details of unique peptides and sequence coverage | 2                    |
| Table S3            | List of peptides and proteins taken for SRM verification experiment                                    | 1                    |
| Table S4            | SRM Transition list1                                                                                   | 1                    |
| Table S5            | SRM Transition list2                                                                                   | 1                    |

## Supplementary Figures

### Supplementary Figure S1

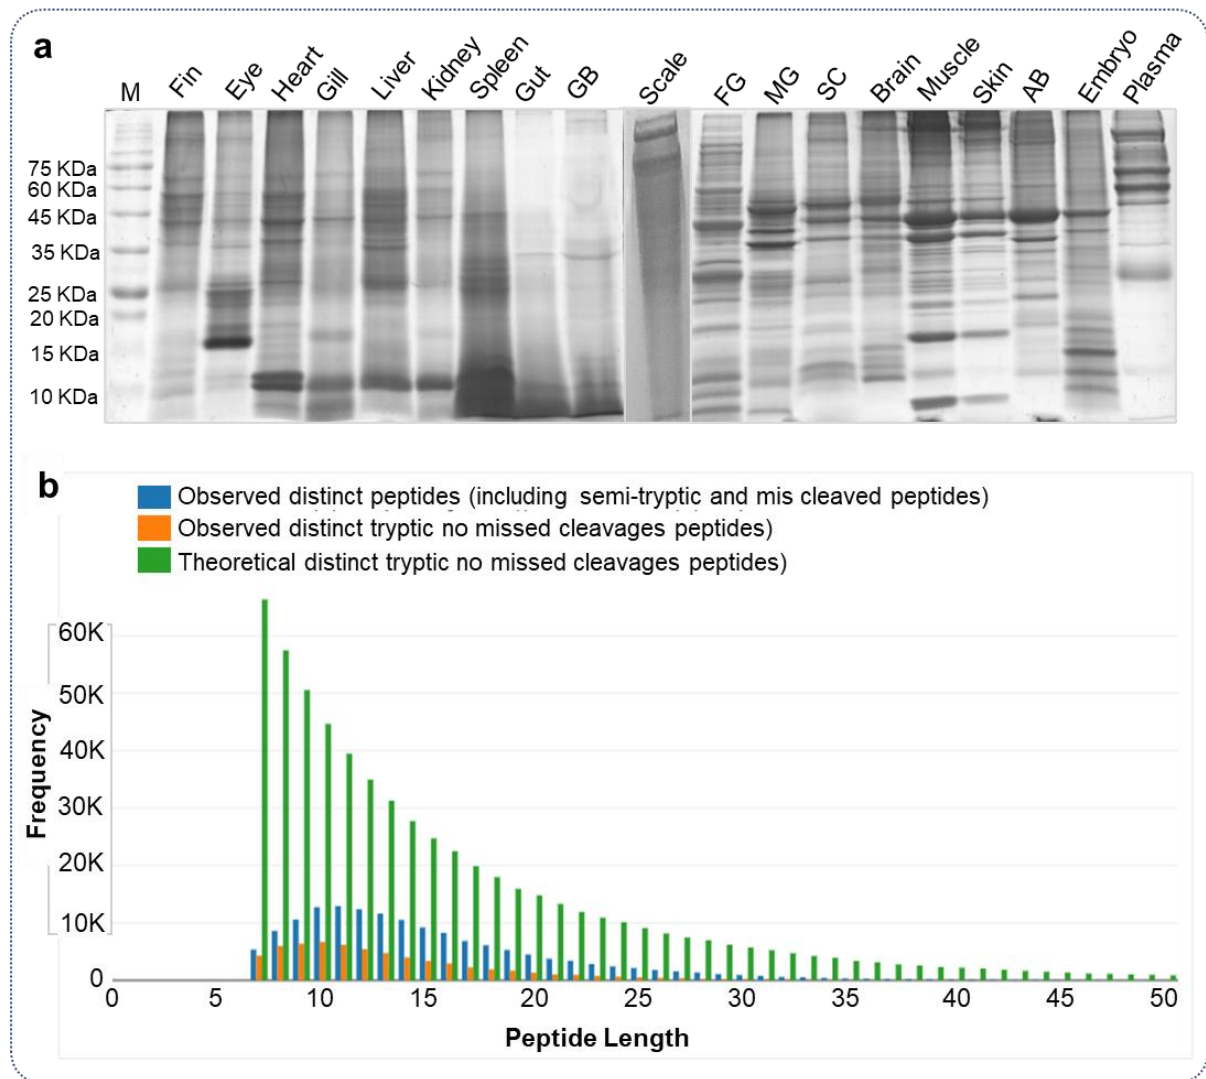

**Supplementary Figure S1| SDS-PAGE profile of all organs and peptide frequency, a.** Showing different band pattern across the organs (AB- Air bladder, GB- gall bladder, FG- female gonad, MG- male gonad, SC- spinal cord), **b.** Frequency of peptides with respect to missed cleavages

## Supplementary Tables

**Supplementary Table S1:** List of all proteins in Rohu PeptideAtlas and EggNOG analysis details

This is an excel workbook and have four worksheets as below.

| S.no. | Worksheet name                     | Description                                                              |
|-------|------------------------------------|--------------------------------------------------------------------------|
| 1     | Total_proteins_PA                  | Total 9286 proteins of peptide atlas (including 6015 canonical proteins) |
| 2     | Canonical proteins                 | Total canonical proteins                                                 |
| 3     | Canonical Protein<br>eggNOG output | EggNOG output for ortholog analysis of all canonical proteins.           |
| 4     | Input_Egg_NOG_Can                  | Input file for barplot of ortholog (related to Figure 2/Table 2)         |

**Supplementary Table S2:** Experiment wise peptide list of Rohu PeptideAtlas and details of unique peptides and sequence coverage.

This is an excel workbook and have two worksheets as below.

| S.no. | Worksheet name               | Description                                                                                                                                                                               |
|-------|------------------------------|-------------------------------------------------------------------------------------------------------------------------------------------------------------------------------------------|
| 1     | Organ_wise_peptides          | This sheet contains tissue/Experiment wise list of peptides enlisted in Rohu PeptideAtlas.                                                                                                |
| 2     | Distinct<br>peptide_Coverage | This sheet contains the list of Canonical proteins with details like number of unique peptides (n_distinct peptides) and percent sequence coverage (Seq.coverage). Input for Figure 3e-f. |

**Supplementary Table S3:** List of peptides and proteins taken for SRM verification experiment

This excel sheet contains the list of peptides along with some peptide wise information as obtained from Rohu PeptideAtlas

**Supplementary Table S4:** SRM Transition list1

This excel sheet is the transition list 1 that was used to create the method file for SRM run in Triple quadrupole mass spectrometer.

**Supplementary Table S5:** SRM Transition list2

This excel sheet is the transition list 1 that was used to create the method file for SRM run in Triple quadrupole mass spectrometer.
