# Supplementary material for: The PeptideAtlas of a widely cultivated fish Labeo rohita: A resource for the Aquaculture Community
Source: PubMed Central journal article supplement (PMC9008064; doi:10.1038/s41597-022-01259-9), 2022-04-13
Supplement: 41597_2022_1259_MOESM2_ESM.pdf [file 41597_2022_1259_MOESM2_ESM.pdf]

## Data Descriptor

### The PeptideAtlas of a widely cultivated fish *Labeo rohita*: A resource for the Aquaculture Community

Mehar Un Nissa<sup>1</sup>, Panga Jaipal Reddy<sup>2§</sup>, Nevil Pinto<sup>3§</sup>, Zhi Sun<sup>2</sup>, Biplab Ghosh<sup>4</sup>, Robert L. Moritz<sup>2</sup>, Mukunda Goswami<sup>3\*</sup> and Sanjeeva Srivastava<sup>1\*</sup>

<sup>1</sup>Department of Biosciences and Bioengineering, Indian Institute of Technology Bombay, Powai, Mumbai 400076, India

<sup>2</sup>Institute for Systems Biology, Seattle, WA, 98109, USA

<sup>3</sup>Central Institute of Fisheries Education, Indian Council of Agricultural Research, Versova, Mumbai, Maharashtra 400061

<sup>4</sup>Regional Centre for Biotechnology, Faridabad, 121001, India

<sup>§</sup>Contributed equally

\*Correspondence for fish work: Dr. Mukunda Goswami, E-mail: [mukugoswami@gmail.com](mailto:mukugoswami@gmail.com)

\*Correspondence for proteomics work: Dr. Sanjeeva Srivastava, E-mail: [sanjeeva@iitb.ac.in](mailto:sanjeeva@iitb.ac.in),

Phone: +91-22-2576-7779, Fax: +91-22-2572-3480

**Supplementary File 1: Tissue wise details of all raw files**

| <b>S. no.</b> | <b>Raw file name</b>                                   | <b>Tissue/ Experiment</b> |
|---------------|--------------------------------------------------------|---------------------------|
| 1             | 13042018_Fusion_Mehar_Airbladder_F1.raw                | Air bladder               |
| 2             | 13042018_Fusion_Mehar_Airbladder_F2.raw                | Air bladder               |
| 3             | 13042018_Fusion_Mehar_Airbladder_F3.raw                | Air bladder               |
| 4             | 13042018_Fusion_Mehar_Airbladder_F4.raw                | Air bladder               |
| 5             | 13042018_Fusion_Mehar_Airbladder_F5.raw                | Air bladder               |
| 6             | 13042018_Fusion_Mehar_Airbladder_F6.raw                | Air bladder               |
| 7             | 18012019_Mehar_Ingel_Air_bladder_pH_2_5_Fr1.raw        | Air bladder               |
| 8             | 18012019_Mehar_Ingel_Air_bladder_pH_2_5_Fr2.raw        | Air bladder               |
| 9             | 18012019_Mehar_Ingel_Air_bladder_pH_2_5_Fr3.raw        | Air bladder               |
| 10            | 18012019_Mehar_Ingel_Air_bladder_pH_2_5_Fr4.raw        | Air bladder               |
| 11            | 18012019_Mehar_Ingel_Air_bladder_pH_2_5_Fr5.raw        | Air bladder               |
| 12            | 18012019_Mehar_Ingel_Air_bladder_pH_2_5_Fr6.raw        | Air bladder               |
| 13            | 19012019_Mehar_Ingel_Air_bladder_pH_13_Fr1.raw         | Air bladder               |
| 14            | 19012019_Mehar_Ingel_Air_bladder_pH_13_Fr2.raw         | Air bladder               |
| 15            | 19012019_Mehar_Ingel_Air_bladder_pH_13_Fr3.raw         | Air bladder               |
| 16            | 19012019_Mehar_Ingel_Air_bladder_pH_13_Fr4.raw         | Air bladder               |
| 17            | 19012019_Mehar_Ingel_Air_bladder_pH_13_Fr5.raw         | Air bladder               |
| 18            | 19012019_Mehar_Ingel_Air_bladder_pH_13_Fr6.raw         | Air bladder               |
| 19            | 03112018_Mehar_Ingel_Brain_pH_2_5_Fr1.raw              | Brain                     |
| 20            | 03112018_Mehar_Ingel_Brain_pH_2_5_Fr2.raw              | Brain                     |
| 21            | 03112018_Mehar_Ingel_Brain_pH_2_5_Fr3.raw              | Brain                     |
| 22            | 03112018_Mehar_Ingel_Brain_pH_2_5_Fr4.raw              | Brain                     |
| 23            | 03112018_Mehar_Ingel_Brain_pH_2_5_Fr5.raw              | Brain                     |
| 24            | 03112018_Mehar_Ingel_Brain_pH_2_5_Fr6.raw              | Brain                     |
| 25            | 04112018_Mehar_Ingel_Brain_pH_13_Fr1.raw               | Brain                     |
| 26            | 04112018_Mehar_Ingel_Brain_pH_13_Fr2.raw               | Brain                     |
| 27            | 04112018_Mehar_Ingel_Brain_pH_13_Fr3.raw               | Brain                     |
| 28            | 04112018_Mehar_Ingel_Brain_pH_13_Fr4.raw               | Brain                     |
| 29            | 04112018_Mehar_Ingel_Brain_pH_13_Fr5.raw               | Brain                     |
| 30            | 04112018_Mehar_Ingel_Brain_pH_13_Fr6.raw               | Brain                     |
| 31            | 25012018_Fusion_Mehar_Ingel_Brain_F1.raw               | Brain                     |
| 32            | 25012018_Fusion_Mehar_Ingel_Brain_F2.raw               | Brain                     |
| 33            | 25012018_Fusion_Mehar_Ingel_Brain_F3.raw               | Brain                     |
| 34            | 25012018_Fusion_Mehar_Ingel_Brain_F4.raw               | Brain                     |
| 35            | 25012018_Fusion_Mehar_Ingel_Brain_F5.raw               | Brain                     |
| 36            | 25012018_Fusion_Mehar_Ingel_Brain_F6.raw               | Brain                     |
| 37            | 27052019_Fusion_2038_Mehar_Ingel_Embryo_Trizol_Fr1.raw | Embryo                    |
| 38            | 27052019_Fusion_2038_Mehar_Ingel_Embryo_Trizol_Fr2.raw | Embryo                    |
| 39            | 27052019_Fusion_2038_Mehar_Ingel_Embryo_Trizol_Fr3.raw | Embryo                    |
| 40            | 27052019_Fusion_2038_Mehar_Ingel_Embryo_Trizol_Fr4.raw | Embryo                    |
| 41            | 27052019_Fusion_2038_Mehar_Ingel_Embryo_Trizol_Fr5.raw | Embryo                    |
| 42            | 29052019_Fusion_2038_Mehar_Ingel_Embryo_Trizol_Fr6.raw | Embryo                    |
| 43            | 24112018_Mehar_Ingel_Eye_pH_13_Fr1.raw                 | Eye                       |

|    |                                                       |              |
|----|-------------------------------------------------------|--------------|
| 44 | 24112018_Mehar_Ingel_Eye_pH_13_Fr2.raw                | Eye          |
| 45 | 24112018_Mehar_Ingel_Eye_pH_13_Fr3.raw                | Eye          |
| 46 | 24112018_Mehar_Ingel_Eye_pH_13_Fr4.raw                | Eye          |
| 47 | 24112018_Mehar_Ingel_Eye_pH_13_Fr5.raw                | Eye          |
| 48 | 24112018_Mehar_Ingel_Eye_pH_13_Fr6.raw                | Eye          |
| 49 | 24112018_Mehar_Ingel_Eye_pH_2_5_Fr1.raw               | Eye          |
| 50 | 24112018_Mehar_Ingel_Eye_pH_2_5_Fr2.raw               | Eye          |
| 51 | 24112018_Mehar_Ingel_Eye_pH_2_5_Fr3.raw               | Eye          |
| 52 | 24112018_Mehar_Ingel_Eye_pH_2_5_Fr4.raw               | Eye          |
| 53 | 24112018_Mehar_Ingel_Eye_pH_2_5_Fr5.raw               | Eye          |
| 54 | 24112018_Mehar_Ingel_Eye_pH_2_5_Fr6.raw               | Eye          |
| 55 | 27012018_Fusion_Mehar_Ingel_Eye_F1.raw                | Eye          |
| 56 | 27012018_Fusion_Mehar_Ingel_Eye_F2.raw                | Eye          |
| 57 | 27012018_Fusion_Mehar_Ingel_Eye_F3.raw                | Eye          |
| 58 | 27012018_Fusion_Mehar_Ingel_Eye_F4.raw                | Eye          |
| 59 | 27012018_Fusion_Mehar_Ingel_Eye_F5.raw                | Eye          |
| 60 | 27012018_Fusion_Mehar_Ingel_Eye_F6.raw                | Eye          |
| 61 | 05042019_Mehar_2038_Ingel_Female_gonad_pH_8_Fr1.raw   | Female gonad |
| 62 | 05042019_Mehar_2038_Ingel_Female_gonad_pH_8_Fr2.raw   | Female gonad |
| 63 | 05042019_Mehar_2038_Ingel_Female_gonad_pH_8_Fr3.raw   | Female gonad |
| 64 | 05042019_Mehar_2038_Ingel_Female_gonad_pH_8_Fr4.raw   | Female gonad |
| 65 | 05042019_Mehar_2038_Ingel_Female_gonad_pH_8_Fr5.raw   | Female gonad |
| 66 | 05042019_Mehar_2038_Ingel_Female_gonad_pH_8_Fr6.raw   | Female gonad |
| 67 | 09042019_Mehar_2038_Ingel_Female_gonad_pH_2_5_Fr1.raw | Female gonad |
| 68 | 09042019_Mehar_2038_Ingel_Female_gonad_pH_2_5_Fr2.raw | Female gonad |
| 69 | 09042019_Mehar_2038_Ingel_Female_gonad_pH_2_5_Fr3.raw | Female gonad |
| 70 | 09042019_Mehar_2038_Ingel_Female_gonad_pH_2_5_Fr4.raw | Female gonad |
| 71 | 09042019_Mehar_2038_Ingel_Female_gonad_pH_2_5_Fr5.raw | Female gonad |
| 72 | 09042019_Mehar_2038_Ingel_Female_gonad_pH_2_5_Fr6.raw | Female gonad |
| 73 | 10042019_Mehar_2038_Ingel_Female_gonad_pH_13_Fr1.raw  | Female gonad |
| 74 | 10042019_Mehar_2038_Ingel_Female_gonad_pH_13_Fr3.raw  | Female gonad |
| 75 | 10042019_Mehar_2038_Ingel_Female_gonad_pH_13_Fr4.raw  | Female gonad |
| 76 | 10042019_Mehar_2038_Ingel_Female_gonad_pH_13_Fr5.raw  | Female gonad |
| 77 | 11042019_Mehar_2038_Ingel_Female_gonad_pH_13_Fr2.raw  | Female gonad |
| 78 | 11042019_Mehar_2038_Ingel_Female_gonad_pH_13_Fr6.raw  | Female gonad |
| 79 | 20092018_Mehar_Ingel_TRIZol_Female_Gonad_Fr1.raw      | Female gonad |
| 80 | 20092018_Mehar_Ingel_TRIZol_Female_Gonad_Fr2.raw      | Female gonad |
| 81 | 20092018_Mehar_Ingel_TRIZol_Female_Gonad_Fr3.raw      | Female gonad |
| 82 | 20092018_Mehar_Ingel_TRIZol_Female_Gonad_Fr4.raw      | Female gonad |
| 83 | 20092018_Mehar_Ingel_TRIZol_Female_Gonad_Fr5.raw      | Female gonad |
| 84 | 20092018_Mehar_Ingel_TRIZol_Female_Gonad_Fr6.raw      | Female gonad |
| 85 | 08042018_Fusion_Mehar_fish_Fin_F1.raw                 | Fin          |
| 86 | 08042018_Fusion_Mehar_fish_Fin_F2.raw                 | Fin          |
| 87 | 08042018_Fusion_Mehar_fish_Fin_F3.raw                 | Fin          |
| 88 | 08042018_Fusion_Mehar_fish_Fin_F4.raw                 | Fin          |
| 89 | 08042018_Fusion_Mehar_fish_Fin_F6.raw                 | Fin          |

|     |                                                          |              |
|-----|----------------------------------------------------------|--------------|
| 90  | 08042018_Fusion_Mehar_fish_Fint_F5.raw                   | Fin          |
| 91  | 10042018_Fusion_Mehar_Gallbladder_F1.raw                 | Gall bladder |
| 92  | 10042018_Fusion_Mehar_Gallbladder_F2.raw                 | Gall bladder |
| 93  | 10042018_Fusion_Mehar_Gallbladder_F3.raw                 | Gall bladder |
| 94  | 10042018_Fusion_Mehar_Gallbladder_F4.raw                 | Gall bladder |
| 95  | 10042018_Fusion_Mehar_Gallbladder_F5.raw                 | Gall bladder |
| 96  | 10042018_Fusion_Mehar_Gallbladder_F6.raw                 | Gall bladder |
| 97  | 25112018_Mehar_Ingel_Gall_Bladder_Extract_TCA_Ac_Fr2.raw | Gall bladder |
| 98  | 25112018_Mehar_Ingel_Gall_Bladder_Extract_TCA_Ac_Fr3.raw | Gall bladder |
| 99  | 25112018_Mehar_Ingel_Gall_Bladder_Extract_TCA_Ac_Fr4.raw | Gall bladder |
| 100 | 03022018_Fusion_Mehar_Gill_F1.raw                        | Gill         |
| 101 | 03022018_Fusion_Mehar_Gill_F2.raw                        | Gill         |
| 102 | 03022018_Fusion_Mehar_Gill_F3.raw                        | Gill         |
| 103 | 03022018_Fusion_Mehar_Gill_F4.raw                        | Gill         |
| 104 | 03022018_Fusion_Mehar_Gill_F5.raw                        | Gill         |
| 105 | 03022018_Fusion_Mehar_Gill_F6.raw                        | Gill         |
| 106 | 30012019_Mehar_Ingel_Gill_pH_2_5_Fr1.raw                 | Gill         |
| 107 | 30012019_Mehar_Ingel_Gill_pH_2_5_Fr2.raw                 | Gill         |
| 108 | 30012019_Mehar_Ingel_Gill_pH_2_5_Fr3.raw                 | Gill         |
| 109 | 30012019_Mehar_Ingel_Gill_pH_2_5_Fr4.raw                 | Gill         |
| 110 | 30012019_Mehar_Ingel_Gill_pH_2_5_Fr5.raw                 | Gill         |
| 111 | 30012019_Mehar_Ingel_Gill_pH_2_5_Fr6.raw                 | Gill         |
| 112 | 31012019_Mehar_Ingel_Gill_pH_13_Fr1.raw                  | Gill         |
| 113 | 31012019_Mehar_Ingel_Gill_pH_13_Fr2.raw                  | Gill         |
| 114 | 31012019_Mehar_Ingel_Gill_pH_13_Fr3.raw                  | Gill         |
| 115 | 31012019_Mehar_Ingel_Gill_pH_13_Fr4.raw                  | Gill         |
| 116 | 31012019_Mehar_Ingel_Gill_pH_13_Fr5.raw                  | Gill         |
| 117 | 31012019_Mehar_Ingel_Gill_pH_13_Fr6.raw                  | Gill         |
| 118 | 16012019_Mehar_Ingel_Gut_pH_2_5_Fr1.raw                  | Gut          |
| 119 | 16012019_Mehar_Ingel_Gut_pH_2_5_Fr2.raw                  | Gut          |
| 120 | 16012019_Mehar_Ingel_Gut_pH_2_5_Fr3.raw                  | Gut          |
| 121 | 16012019_Mehar_Ingel_Gut_pH_2_5_Fr4.raw                  | Gut          |
| 122 | 16012019_Mehar_Ingel_Gut_pH_2_5_Fr5.raw                  | Gut          |
| 123 | 16012019_Mehar_Ingel_Gut_pH_2_5_Fr6.raw                  | Gut          |
| 124 | 17012019_Mehar_Ingel_Gut_pH_13_Fr1.raw                   | Gut          |
| 125 | 17012019_Mehar_Ingel_Gut_pH_13_Fr2.raw                   | Gut          |
| 126 | 17012019_Mehar_Ingel_Gut_pH_13_Fr3.raw                   | Gut          |
| 127 | 17012019_Mehar_Ingel_Gut_pH_13_Fr4.raw                   | Gut          |
| 128 | 17012019_Mehar_Ingel_Gut_pH_13_Fr5.raw                   | Gut          |
| 129 | 17012019_Mehar_Ingel_Gut_pH_13_Fr6.raw                   | Gut          |
| 130 | 25012018_Fusion_Mehar_Ingel_Gut_F1.raw                   | Gut          |
| 131 | 25012018_Fusion_Mehar_Ingel_Gut_F2.raw                   | Gut          |
| 132 | 25012018_Fusion_Mehar_Ingel_Gut_F3.raw                   | Gut          |
| 133 | 25012018_Fusion_Mehar_Ingel_Gut_F4.raw                   | Gut          |
| 134 | 25012018_Fusion_Mehar_Ingel_Gut_F5.raw                   | Gut          |
| 135 | 25012018_Fusion_Mehar_Ingel_Gut_F6.raw                   | Gut          |

|     |                                            |        |
|-----|--------------------------------------------|--------|
| 136 | 08112018_Mehar_Ingel_Heart_pH_2_5_Fr1.raw  | Heart  |
| 137 | 08112018_Mehar_Ingel_Heart_pH_2_5_Fr2.raw  | Heart  |
| 138 | 08112018_Mehar_Ingel_Heart_pH_2_5_Fr3.raw  | Heart  |
| 139 | 08112018_Mehar_Ingel_Heart_pH_2_5_Fr4.raw  | Heart  |
| 140 | 08112018_Mehar_Ingel_Heart_pH_2_5_Fr5.raw  | Heart  |
| 141 | 08112018_Mehar_Ingel_Heart_pH_2_5_Fr6.raw  | Heart  |
| 142 | 15112018_Mehar_Ingel_Heart_pH_13_Fr1.raw   | Heart  |
| 143 | 15112018_Mehar_Ingel_Heart_pH_13_Fr2.raw   | Heart  |
| 144 | 15112018_Mehar_Ingel_Heart_pH_13_Fr3.raw   | Heart  |
| 145 | 15112018_Mehar_Ingel_Heart_pH_13_Fr4.raw   | Heart  |
| 146 | 16112018_Mehar_Ingel_Heart_pH_13_Fr5.raw   | Heart  |
| 147 | 16112018_Mehar_Ingel_Heart_pH_13_Fr6.raw   | Heart  |
| 148 | 18032018_Fusion_Mehar_fish_Heart_F1.raw    | Heart  |
| 149 | 18032018_Fusion_Mehar_fish_Heart_F2.raw    | Heart  |
| 150 | 18032018_Fusion_Mehar_fish_Heart_F3.raw    | Heart  |
| 151 | 18032018_Fusion_Mehar_fish_Heart_F4.raw    | Heart  |
| 152 | 18032018_Fusion_Mehar_fish_Heart_F5.raw    | Heart  |
| 153 | 18032018_Fusion_Mehar_fish_Heart_F6.raw    | Heart  |
| 154 | 24102018_Mehar_Ingel_Kidney_pH_2_5_Fr1.raw | Kidney |
| 155 | 24102018_Mehar_Ingel_Kidney_pH_2_5_Fr2.raw | Kidney |
| 156 | 25102018_Mehar_Ingel_Kidney_pH_2_5_Fr3.raw | Kidney |
| 157 | 25102018_Mehar_Ingel_Kidney_pH_2_5_Fr4.raw | Kidney |
| 158 | 25102018_Mehar_Ingel_Kidney_pH_2_5_Fr5.raw | Kidney |
| 159 | 25102018_Mehar_Ingel_Kidney_pH_2_5_Fr6.raw | Kidney |
| 160 | 26102018_Mehar_Ingel_Kidney_pH_13_Fr1.raw  | Kidney |
| 161 | 27012018_Fusion_Mehar_Ingel_Kidney_F1.raw  | Kidney |
| 162 | 27012018_Fusion_Mehar_Ingel_Kidney_F2.raw  | Kidney |
| 163 | 27012018_Fusion_Mehar_Ingel_Kidney_F3.raw  | Kidney |
| 164 | 27012018_Fusion_Mehar_Ingel_Kidney_F4.raw  | Kidney |
| 165 | 27012018_Fusion_Mehar_Ingel_Kidney_F5.raw  | Kidney |
| 166 | 27012018_Fusion_Mehar_Ingel_Kidney_F6.raw  | Kidney |
| 167 | 27102018_Mehar_Ingel_Kidney_pH_13_Fr2.raw  | Kidney |
| 168 | 27102018_Mehar_Ingel_Kidney_pH_13_Fr3.raw  | Kidney |
| 169 | 27102018_Mehar_Ingel_Kidney_pH_13_Fr4.raw  | Kidney |
| 170 | 27102018_Mehar_Ingel_Kidney_pH_13_Fr5.raw  | Kidney |
| 171 | 27102018_Mehar_Ingel_Kidney_pH_13_Fr6.raw  | Kidney |
| 172 | 17032018_Fusion_Mehar_fish_liver_F1.raw    | Liver  |
| 173 | 17032018_Fusion_Mehar_fish_liver_F2.raw    | Liver  |
| 174 | 17032018_Fusion_Mehar_fish_liver_F3.raw    | Liver  |
| 175 | 17032018_Fusion_Mehar_fish_liver_F4.raw    | Liver  |
| 176 | 17032018_Fusion_Mehar_fish_liver_F5.raw    | Liver  |
| 177 | 17032018_Fusion_Mehar_fish_liver_F6.raw    | Liver  |
| 178 | 28102018_Mehar_Ingel_Liver_pH_2_5_Fr1.raw  | Liver  |
| 179 | 28102018_Mehar_Ingel_Liver_pH_2_5_Fr2.raw  | Liver  |
| 180 | 28102018_Mehar_Ingel_Liver_pH_2_5_Fr3.raw  | Liver  |
| 181 | 28102018_Mehar_Ingel_Liver_pH_2_5_Fr4.raw  | Liver  |

|     |                                                |            |
|-----|------------------------------------------------|------------|
| 182 | 28102018_Mehar_Ingel_Liver_pH_2_5_Fr5.raw      | Liver      |
| 183 | 28102018_Mehar_Ingel_Liver_pH_2_5_Fr6.raw      | Liver      |
| 184 | 29102018_Mehar_Ingel_Liver_pH_13_Fr1.raw       | Liver      |
| 185 | 29102018_Mehar_Ingel_Liver_pH_13_Fr2.raw       | Liver      |
| 186 | 29102018_Mehar_Ingel_Liver_pH_13_Fr3.raw       | Liver      |
| 187 | 29102018_Mehar_Ingel_Liver_pH_13_Fr4.raw       | Liver      |
| 188 | 29102018_Mehar_Ingel_Liver_pH_13_Fr5.raw       | Liver      |
| 189 | 29102018_Mehar_Ingel_Liver_pH_13_Fr6.raw       | Liver      |
| 190 | 19082018_Mehar_Ingel_Male_Gonad_Fr1.raw        | Male gonad |
| 191 | 19082018_Mehar_Ingel_Male_Gonad_Fr2.raw        | Male gonad |
| 192 | 19082018_Mehar_Ingel_Male_Gonad_Fr3.raw        | Male gonad |
| 193 | 19082018_Mehar_Ingel_Male_Gonad_Fr4.raw        | Male gonad |
| 194 | 19082018_Mehar_Ingel_Male_Gonad_Fr5.raw        | Male gonad |
| 195 | 19082018_Mehar_Ingel_Male_Gonad_Fr6.raw        | Male gonad |
| 196 | 25112018_Mehar_Ingel_Male_gonad_pH_2_5_Fr1.raw | Male gonad |
| 197 | 25112018_Mehar_Ingel_Male_gonad_pH_2_5_Fr2.raw | Male gonad |
| 198 | 25112018_Mehar_Ingel_Male_gonad_pH_2_5_Fr3.raw | Male gonad |
| 199 | 25112018_Mehar_Ingel_Male_gonad_pH_2_5_Fr4.raw | Male gonad |
| 200 | 25112018_Mehar_Ingel_Male_gonad_pH_2_5_Fr5.raw | Male gonad |
| 201 | 25112018_Mehar_Ingel_Male_gonad_pH_2_5_Fr6.raw | Male gonad |
| 202 | 28112018_Mehar_Ingel_Male_gonad_pH_13_Fr1.raw  | Male gonad |
| 203 | 28112018_Mehar_Ingel_Male_gonad_pH_13_Fr2.raw  | Male gonad |
| 204 | 28112018_Mehar_Ingel_Male_gonad_pH_13_Fr3.raw  | Male gonad |
| 205 | 28112018_Mehar_Ingel_Male_gonad_pH_13_Fr4.raw  | Male gonad |
| 206 | 28112018_Mehar_Ingel_Male_gonad_pH_13_Fr5.raw  | Male gonad |
| 207 | 28112018_Mehar_Ingel_Male_gonad_pH_13_Fr6.raw  | Male gonad |
| 208 | 03022018_Fusion_Mehar_Muscle_F1.raw            | Muscle     |
| 209 | 03022018_Fusion_Mehar_Muscle_F2.raw            | Muscle     |
| 210 | 03022018_Fusion_Mehar_Muscle_F3.raw            | Muscle     |
| 211 | 03022018_Fusion_Mehar_Muscle_F4.raw            | Muscle     |
| 212 | 03022018_Fusion_Mehar_Muscle_F5.raw            | Muscle     |
| 213 | 03022018_Fusion_Mehar_Muscle_F6.raw            | Muscle     |
| 214 | 04082018_QE_Mehar_Muscle_Manu.raw              | Muscle     |
| 215 | 09102018_Mehar_Ingel_Muscle_pH_2_5_Fr1.raw     | Muscle     |
| 216 | 09102018_Mehar_Ingel_Muscle_pH_2_5_Fr2.raw     | Muscle     |
| 217 | 09102018_Mehar_Ingel_Muscle_pH_2_5_Fr3.raw     | Muscle     |
| 218 | 09102018_Mehar_Ingel_Muscle_pH_2_5_Fr4.raw     | Muscle     |
| 219 | 09102018_Mehar_Ingel_Muscle_pH_2_5_Fr5.raw     | Muscle     |
| 220 | 09102018_Mehar_Ingel_Muscle_pH_2_5_Fr6.raw     | Muscle     |
| 221 | 10102018_Mehar_Ingel_Muscle_pH_13_Fr1.raw      | Muscle     |
| 222 | 10102018_Mehar_Ingel_Muscle_pH_13_Fr2.raw      | Muscle     |
| 223 | 10102018_Mehar_Ingel_Muscle_pH_13_Fr3.raw      | Muscle     |
| 224 | 10102018_Mehar_Ingel_Muscle_pH_13_Fr4.raw      | Muscle     |
| 225 | 10102018_Mehar_Ingel_Muscle_pH_13_Fr5.raw      | Muscle     |
| 226 | 10102018_Mehar_Ingel_Muscle_pH_13_Fr6.raw      | Muscle     |
| 227 | 20072018_QE_Mehar_Insol_Muscle_BGZT_lug.raw    | Muscle     |

|     |                                                        |                     |
|-----|--------------------------------------------------------|---------------------|
| 228 | 20072018_QE_Mehar_Insol_Muscle_BGZT_600ng.raw          | Muscle              |
| 229 | 18072019_Fusion_2038_Mehar_Fem_Plasma_Ingel_Fr1.raw    | Female blood plasma |
| 230 | 18072019_Fusion_2038_Mehar_Fem_Plasma_Ingel_Fr2.raw    | Female blood plasma |
| 231 | 18072019_Fusion_2038_Mehar_Fem_Plasma_Ingel_Fr3_4.raw  | Female blood plasma |
| 232 | 18072019_Fusion_2038_Mehar_Fem_Plasma_Ingel_Fr5_6.raw  | Female blood plasma |
| 233 | 18072019_Fusion_2038_Mehar_Fem_Plasma_Ingel_Fr7.raw    | Female blood plasma |
| 234 | 19072019_Fusion_2038_Mehar_Fem_Plasma_Ingel_Fr11.raw   | Female blood plasma |
| 235 | 19072019_Fusion_2038_Mehar_Fem_Plasma_Ingel_Fr8.raw    | Female blood plasma |
| 236 | 19072019_Fusion_2038_Mehar_Fem_Plasma_Ingel_Fr9_10.raw | Female blood plasma |
| 237 | 07042018_Fusion_Mehar_fish_Scale_F1.raw                | Scale               |
| 238 | 07042018_Fusion_Mehar_fish_Scale_F2.raw                | Scale               |
| 239 | 07042018_Fusion_Mehar_fish_Scale_F3.raw                | Scale               |
| 240 | 07042018_Fusion_Mehar_fish_Scale_F4.raw                | Scale               |
| 241 | 07042018_Fusion_Mehar_fish_Scale_F5.raw                | Scale               |
| 242 | 07042018_Fusion_Mehar_fish_Scale_F6.raw                | Scale               |
| 243 | 08042018_Fusion_Mehar_fish_Scale_F1.raw                | Scale               |
| 244 | 08042018_Fusion_Mehar_fish_Scale_F2.raw                | Scale               |
| 245 | 08042018_Fusion_Mehar_fish_Scale_F3.raw                | Scale               |
| 246 | 08112018_Mehar_Ingel_Scales_pH_2_5_Fr_1456_Pool.raw    | Scale               |
| 247 | 08112018_Mehar_Ingel_Scales_pH_2_5_Fr2.raw             | Scale               |
| 248 | 08112018_Mehar_Ingel_Scales_pH_2_5_Fr3.raw             | Scale               |
| 249 | 16112018_Mehar_Ingel_Scales_pH_13_Fr2.raw              | Scale               |
| 250 | 16112018_Mehar_Ingel_Scales_pH_13_Fr3.raw              | Scale               |
| 251 | 16112018_Mehar_Ingel_Scales_pH_13_Fr_Pool_1456.raw     | Scale               |
| 252 | 05012019_Mehar_Ingel_Skin_pH_13_Fr1.raw                | Skin                |
| 253 | 05012019_Mehar_Ingel_Skin_pH_13_Fr2.raw                | Skin                |
| 254 | 05012019_Mehar_Ingel_Skin_pH_2_5_Fr1.raw               | Skin                |
| 255 | 05012019_Mehar_Ingel_Skin_pH_2_5_Fr2.raw               | Skin                |
| 256 | 05012019_Mehar_Ingel_Skin_pH_2_5_Fr3.raw               | Skin                |
| 257 | 07012019_Mehar_Ingel_Skin_pH_13_pool_Fr3456.raw        | Skin                |
| 258 | 07012019_Mehar_Ingel_Skin_pH_2_5_pool_Fr456.raw        | Skin                |
| 259 | 09042018_Fusion_Mehar_Skin_Fr1.raw                     | Skin                |
| 260 | 09042018_Fusion_Mehar_Skin_Fr2.raw                     | Skin                |
| 261 | 09042018_Fusion_Mehar_Skin_Fr3.raw                     | Skin                |
| 262 | 09042018_Fusion_Mehar_Skin_Fr4.raw                     | Skin                |
| 263 | 09042018_Fusion_Mehar_Skin_Fr5.raw                     | Skin                |
| 264 | 09042018_Fusion_Mehar_Skin_Fr6.raw                     | Skin                |
| 265 | 19032018_Fusion_Mehar_fish_Spinal_F1.raw               | Spinal cord         |
| 266 | 19032018_Fusion_Mehar_fish_Spinal_F2.raw               | Spinal cord         |
| 267 | 19032018_Fusion_Mehar_fish_Spinal_F3.raw               | Spinal cord         |
| 268 | 19032018_Fusion_Mehar_fish_Spinal_F4.raw               | Spinal cord         |
| 269 | 19032018_Fusion_Mehar_fish_Spinal_F5.raw               | Spinal cord         |
| 270 | 19032018_Fusion_Mehar_fish_Spinal_F6.raw               | Spinal cord         |
| 271 | 28122018_Mehar_Ingel_Spinal_cord_pH_2_5_Fr1.raw        | Spinal cord         |
| 272 | 28122018_Mehar_Ingel_Spinal_cord_pH_2_5_Fr2.raw        | Spinal cord         |
| 273 | 28122018_Mehar_Ingel_Spinal_cord_pH_2_5_Fr3.raw        | Spinal cord         |

|     |                                                        |             |
|-----|--------------------------------------------------------|-------------|
| 274 | 28122018_Mehar_Ingel_Spinal_cord_pH_2_5_Fr4.raw        | Spinal cord |
| 275 | 28122018_Mehar_Ingel_Spinal_cord_pH_2_5_Fr5.raw        | Spinal cord |
| 276 | 28122018_Mehar_Ingel_Spinal_cord_pH_2_5_Fr6.raw        | Spinal cord |
| 277 | 29122018_Mehar_Ingel_Spinal_cord_pH_13_Fr1.raw         | Spinal cord |
| 278 | 29122018_Mehar_Ingel_Spinal_cord_pH_13_Fr2.raw         | Spinal cord |
| 279 | 29122018_Mehar_Ingel_Spinal_cord_pH_13_Fr3.raw         | Spinal cord |
| 280 | 29122018_Mehar_Ingel_Spinal_cord_pH_13_Fr4.raw         | Spinal cord |
| 281 | 29122018_Mehar_Ingel_Spinal_cord_pH_13_Fr5.raw         | Spinal cord |
| 282 | 30122018_Mehar_Ingel_Spinal_cord_pH_13_Fr6.raw         | Spinal cord |
| 283 | 07082019_Fusion_2038_Mehar_Ingel_Spleen_pH_2_5_Fr1.raw | Spleen      |
| 284 | 07082019_Fusion_2038_Mehar_Ingel_Spleen_pH_2_5_Fr2.raw | Spleen      |
| 285 | 07082019_Fusion_2038_Mehar_Ingel_Spleen_pH_2_5_Fr3.raw | Spleen      |
| 286 | 07082019_Fusion_2038_Mehar_Ingel_Spleen_pH_2_5_Fr4.raw | Spleen      |
| 287 | 07082019_Fusion_2038_Mehar_Ingel_Spleen_pH_2_5_Fr5.raw | Spleen      |
| 288 | 07082019_Fusion_2038_Mehar_Ingel_Spleen_pH_2_5_Fr6.raw | Spleen      |
| 289 | 08082019_Fusion_2038_Mehar_Ingel_Spleen_pH_13_Fr1.raw  | Spleen      |
| 290 | 09082019_Fusion_2038_Mehar_Ingel_Spleen_pH_13_Fr2.raw  | Spleen      |
| 291 | 09082019_Fusion_2038_Mehar_Ingel_Spleen_pH_13_Fr3.raw  | Spleen      |
| 292 | 09082019_Fusion_2038_Mehar_Ingel_Spleen_pH_13_Fr4.raw  | Spleen      |
| 293 | 19032018_Fusion_Mehar_fish_Spleen_F1.raw               | Spleen      |
| 294 | 19032018_Fusion_Mehar_fish_Spleen_F2.raw               | Spleen      |
| 295 | 19032018_Fusion_Mehar_fish_Spleen_F3.raw               | Spleen      |
| 296 | 19032018_Fusion_Mehar_fish_Spleen_F4.raw               | Spleen      |
| 297 | 23032018_Fusion_Mehar_fish_Spleen_F5.raw               | Spleen      |
| 298 | 23032018_Fusion_Mehar_fish_Spleen_F6.raw               | Spleen      |
